# Supplementary material for: ZnO–BaTiO 3 vertically aligned nanocomposite (VAN) thin films with tailorable morphology and functionalities
Source: Royal Society of Chemistry journal article supplement (doi:10.1039/d5nr03110a), 2025-01-01
Supplement: d5nr03110a1.pdf [file d5nr03110a1.pdf]

## Supplementary Information

### **ZnO- BaTiO<sub>3</sub> Vertically Aligned Nanocomposite (VAN) Thin Films with Tailorable Morphology and Functionalities**

Nirali A. Bhatt<sup>1</sup>, Jianan Shen<sup>1</sup>, James P. Barnard<sup>1</sup>, Juanjuan Lu<sup>1</sup>, Lizabeth Quigley<sup>1</sup>, Claire A. Mihalko<sup>1</sup>, Jeremy Gan<sup>1</sup>, Jialong Huang<sup>1</sup>, Benson Kunhung Tsai<sup>1</sup>, Abhijeet Choudhury<sup>1</sup>, Aleem Siddiqui<sup>2</sup>, Raktim Sarma<sup>2,3</sup>, Haiyan Wang<sup>1,4,\*</sup>

<sup>1</sup> School of Materials Engineering, Purdue University, West Lafayette, IN 47907, USA

<sup>2</sup> Sandia National Laboratories, Albuquerque, NM 87123, USA

<sup>3</sup> Center for Integrated Nanotechnologies, Sandia National Laboratories, Albuquerque, NM 87123, USA

<sup>4</sup> School of Electrical and Computer Engineering, Purdue University, West Lafayette, IN 47907, USA

\* Author to whom correspondence should be addressed: hwang00@purdue.edu

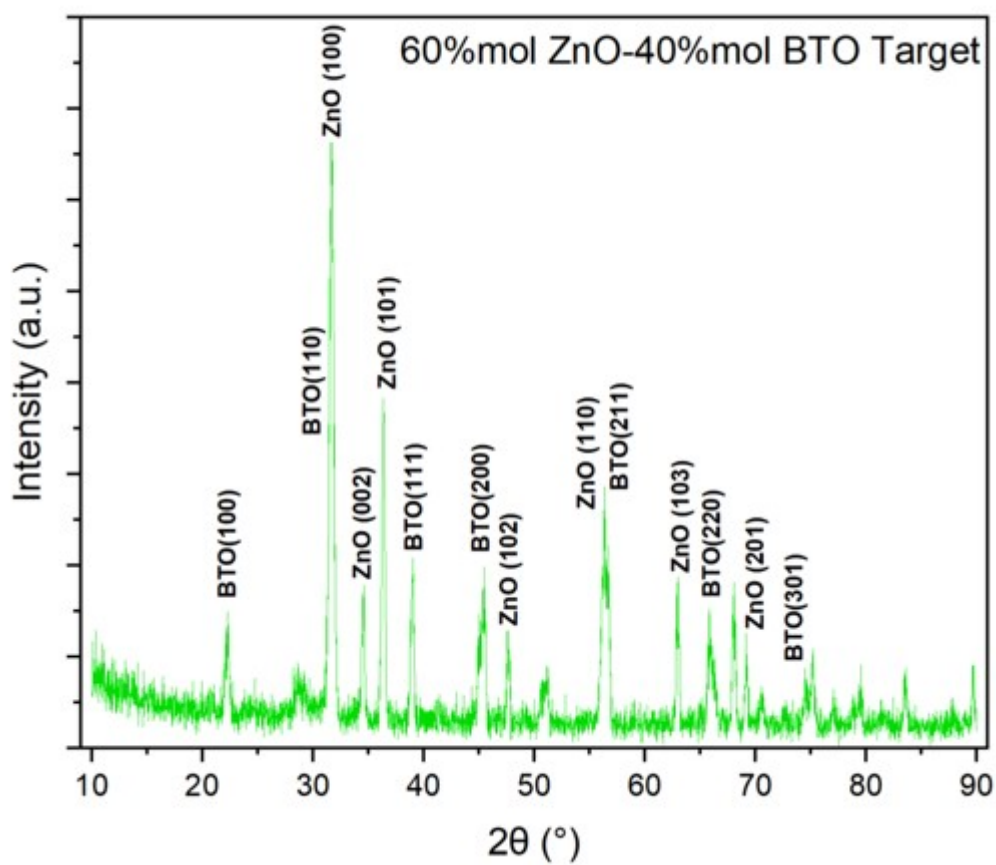

**Figure S1:** XRD  $\theta - 2\theta$  scan of the 60%mol ZnO -40%mol BTO nanocomposite target.

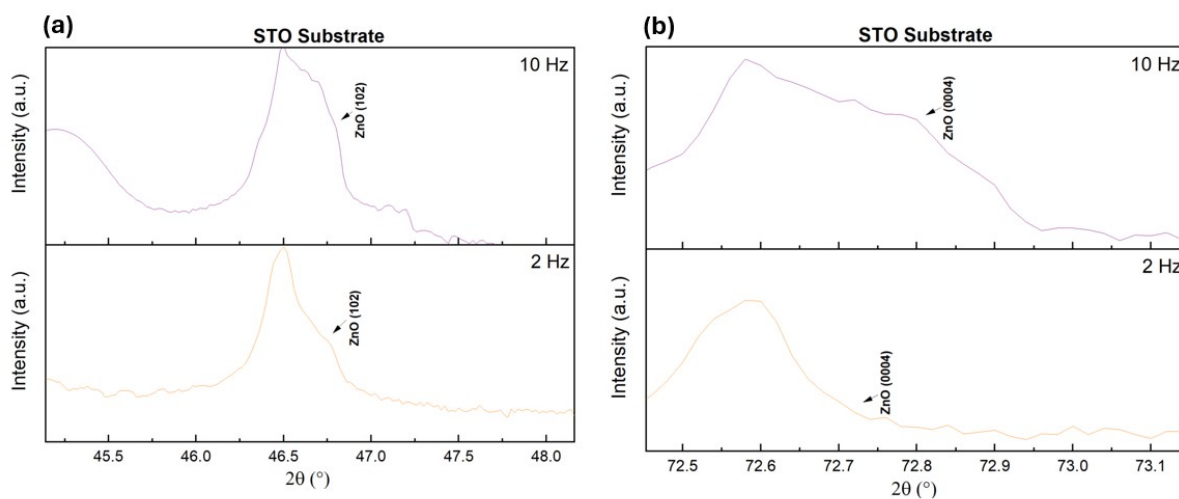

**Figure S2:** (a) ZnO (102) shoulder peak for 10 Hz and 2 Hz ZnO-BTO on STO. (b) ZnO(0004) shoulder peak for 10 Hz and 2 Hz ZnO-BTO on STO.

| Peak                       | Laser Frequency | d-spacing (Å) |
|----------------------------|-----------------|---------------|
| BTO (100) peak on STO      | 2hz             | 4.059         |
| BTO (100) peak on STO      | 10hz            | 4.008         |
| ZnO(0004) peak on STO      | 2hz             | 1.299         |
| ZnO(0004) peak on STO      | 10hz            | 1.298         |
|                            |                 |               |
| BTO (200) peak on Sapphire | 2hz             | 2.009         |
| BTO (200) peak on Sapphire | 10hz            | 2.004         |
| ZnO(0002) peak on Sapphire | 2hz             | 2.583         |
| ZnO(0002) peak on Sapphire | 10hz            | 2.596         |

**Table S1:** Table showing the d-spacing for the corresponding peak and laser frequency. The d-spacing was calculated using the XRD data and Bragg's law.

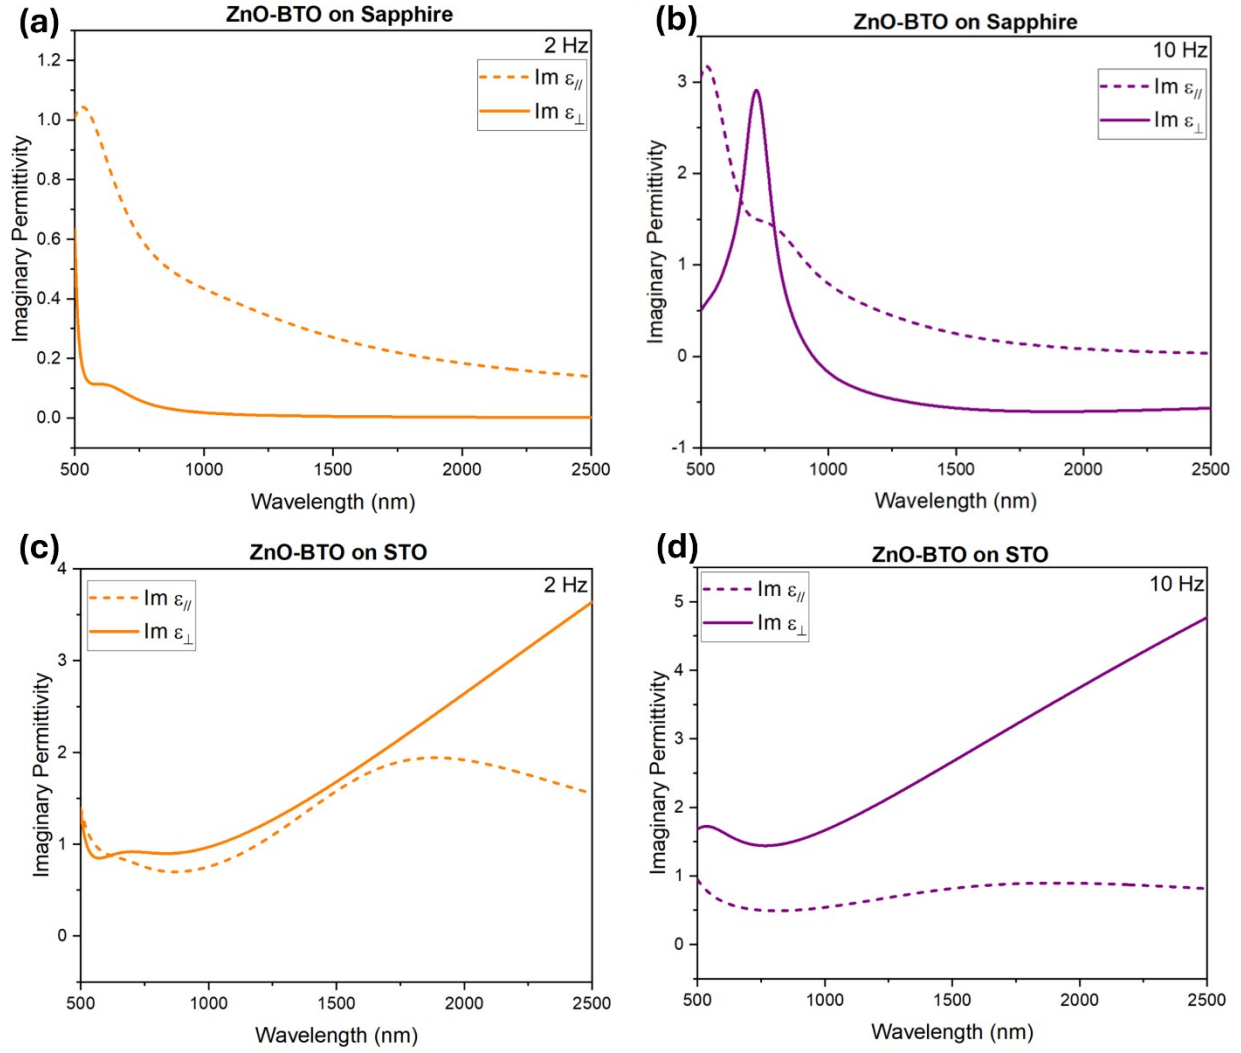

**Figure S3:** Imaginary permittivity of the ZnO-BTO VAN films. The dotted line is the in-plane imaginary permittivity while the solid line is the out of plane imaginary permittivity of (a) 2 Hz ZnO-BTO on Sapphire, (b) 10 Hz ZnO-BTO on Sapphire, (c) 2 Hz ZnO-BTO on STO, and (d) 10 Hz ZnO-BTO on STO.

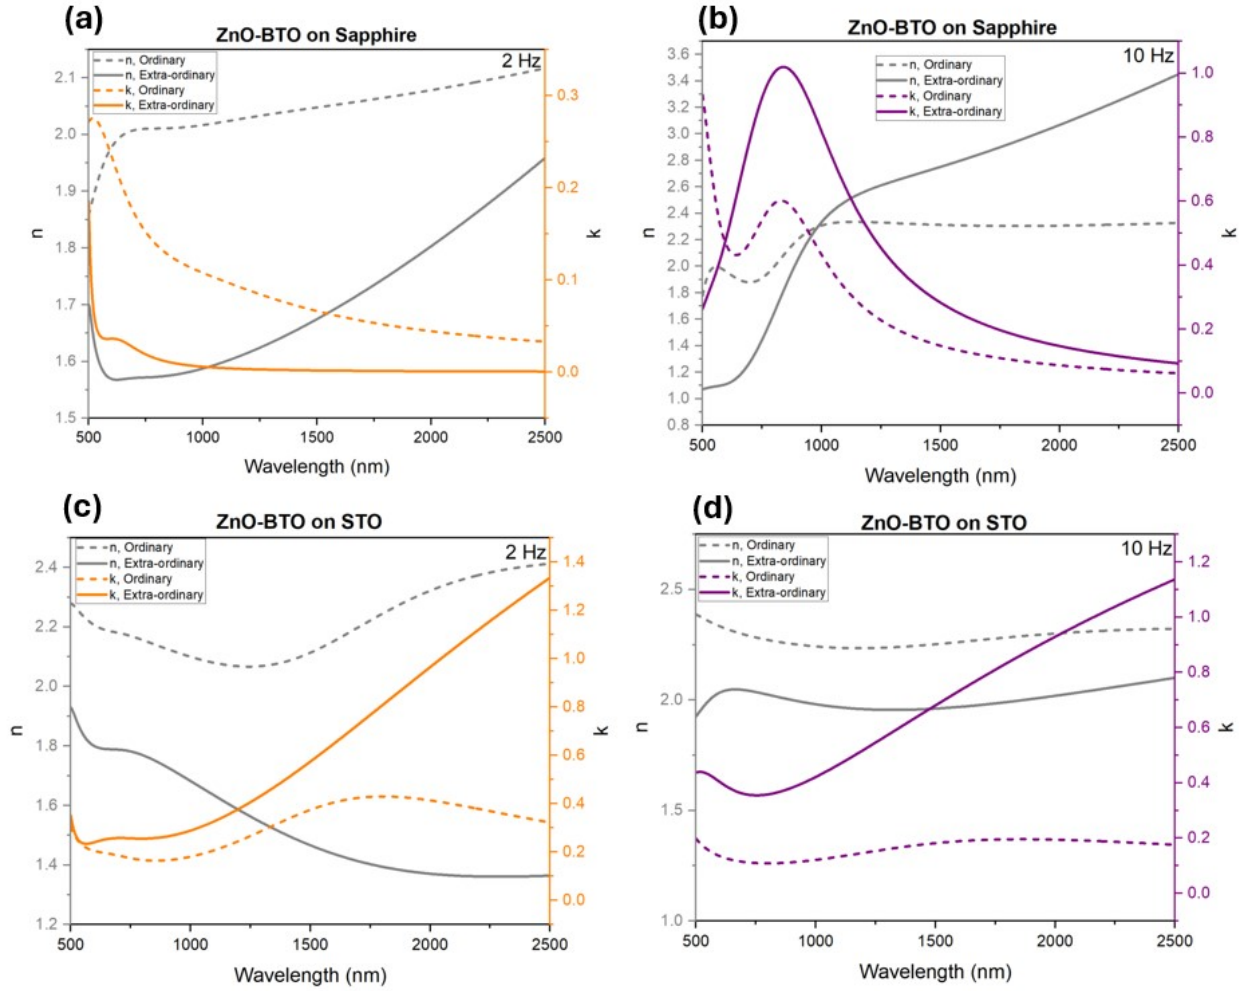

**Figure S4:** The refractive index ( $n$ ) and extinction coefficient ( $k$ ) of the films.  $n$  and  $k$  are shown for both in-plane(ordinary) and out of plane(extraordinary). The dotted line is the in-plane while the solid line is the out of plane. The plots show  $n$  and  $k$  of (a) 2 Hz ZnO-BTO on Sapphire, (b) 10 Hz ZnO-BTO on Sapphire, and (c) 2 Hz ZnO-BTO on STO, and (d) 10 Hz ZnO-BTO on STO.

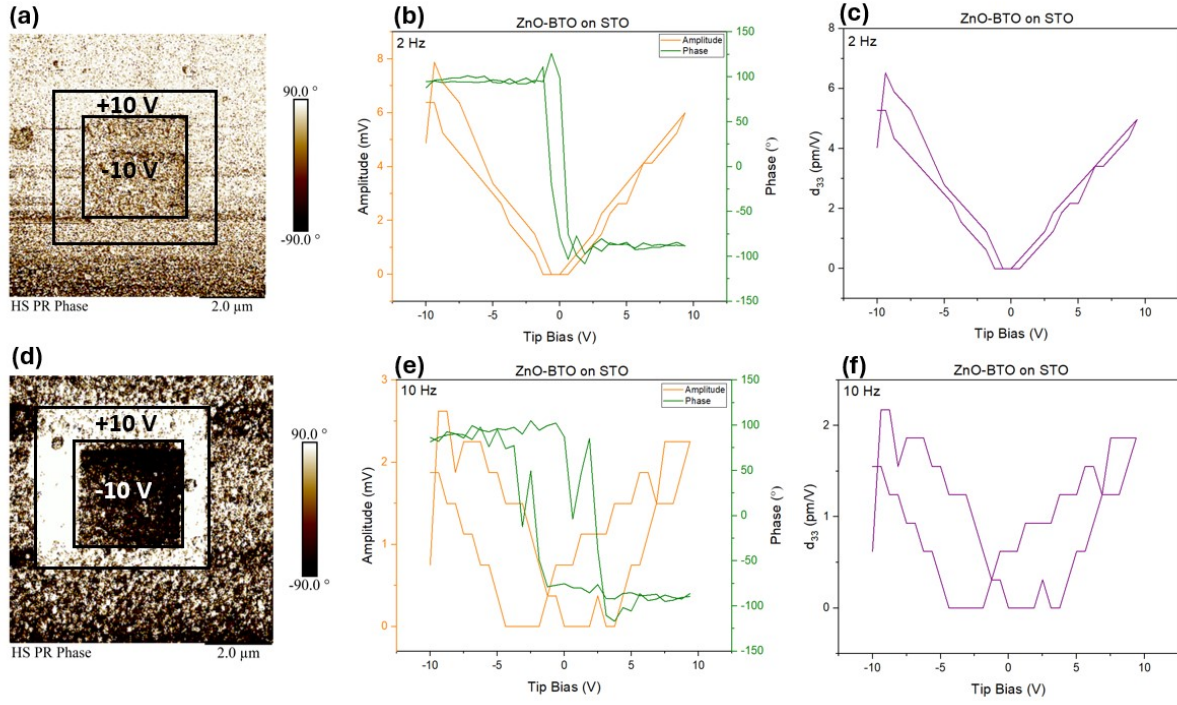

**Figure S5:** (a) PFM phase map, (b) phase and amplitude, and (c)  $d_{33}$  coefficient for the 2 Hz ZnO-BTO on STO. (d) PFM phase map, (e) phase and amplitude, and (f)  $d_{33}$  coefficient for the 10 Hz ZnO-BTO on STO.

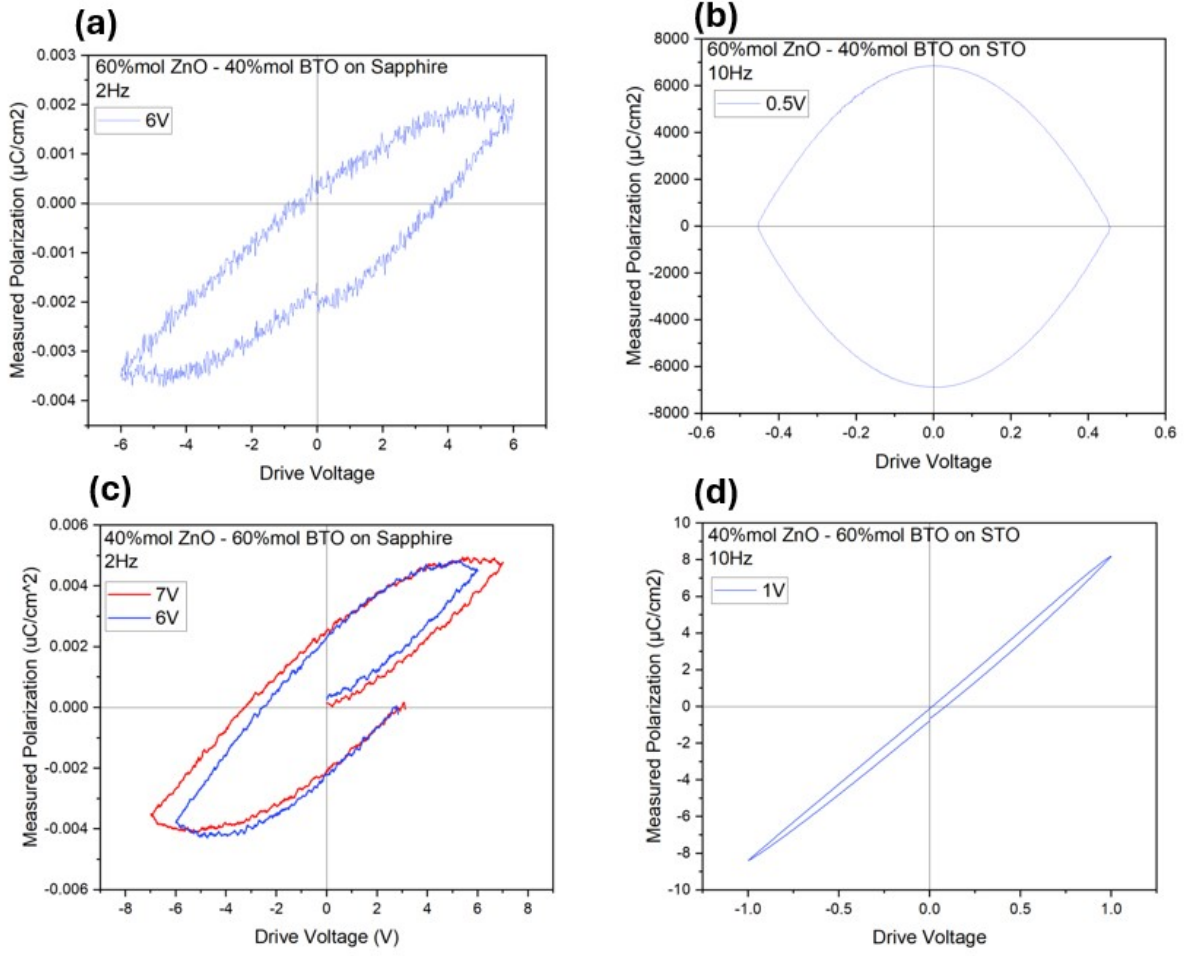

**Figure S6:** P-E loop of (a) 2 Hz 60% mol ZnO – 40% mol BTO on Sapphire, (b) 10 Hz 60% mol ZnO – 40% mol BTO on STO, (c) 2 Hz 40% mol ZnO – 60% mol BTO on Sapphire, and (d) 10 Hz 40% mol ZnO – 60% mol BTO on STO.



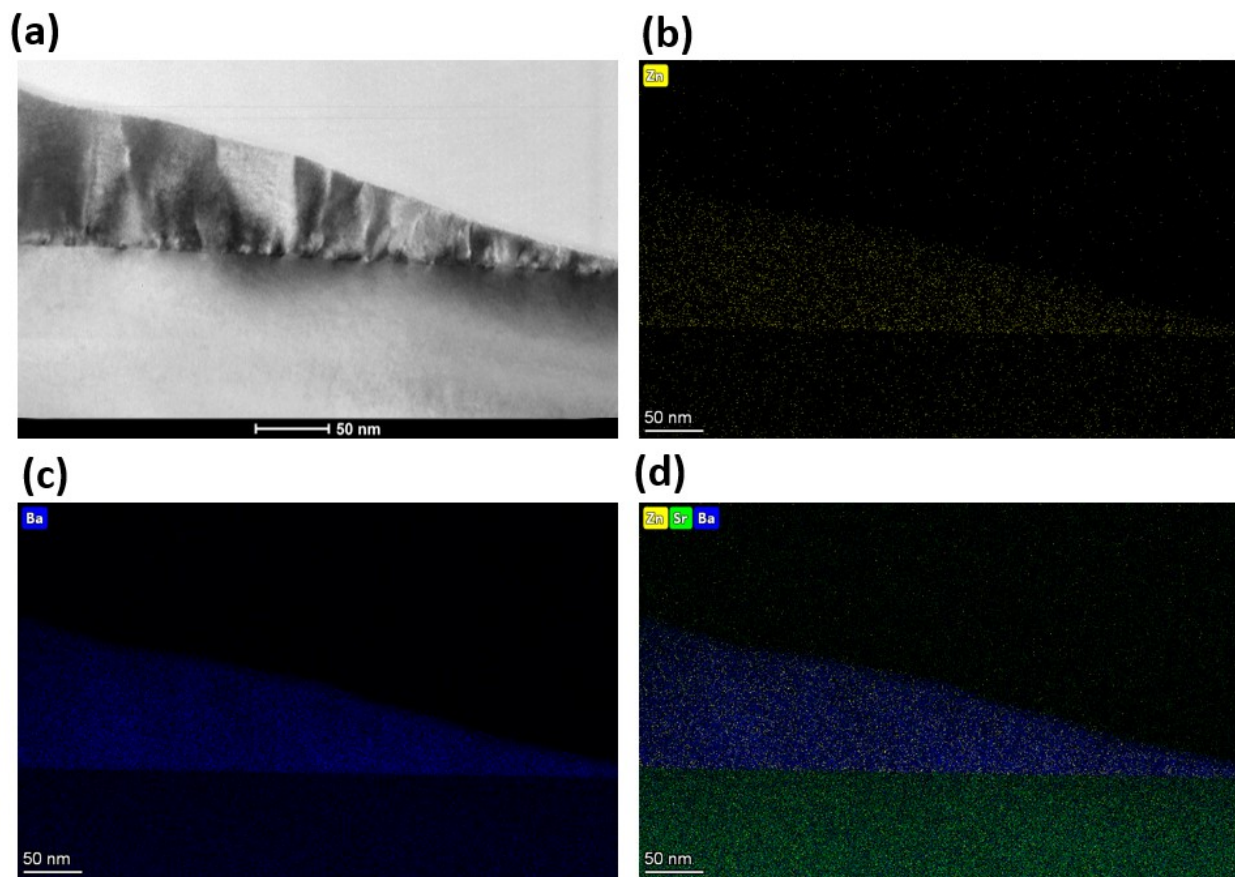

**Figure S7:** (a) TEM, (b) EDS of Zn, (c) Ba, and (d) combined Zn, Ba, Sr of 10 Hz 40%mol ZnO-60%mol BTO on STO. This growth is cleared homogenous and shows that this concentration of ZnO-BTO does not grow VAN.



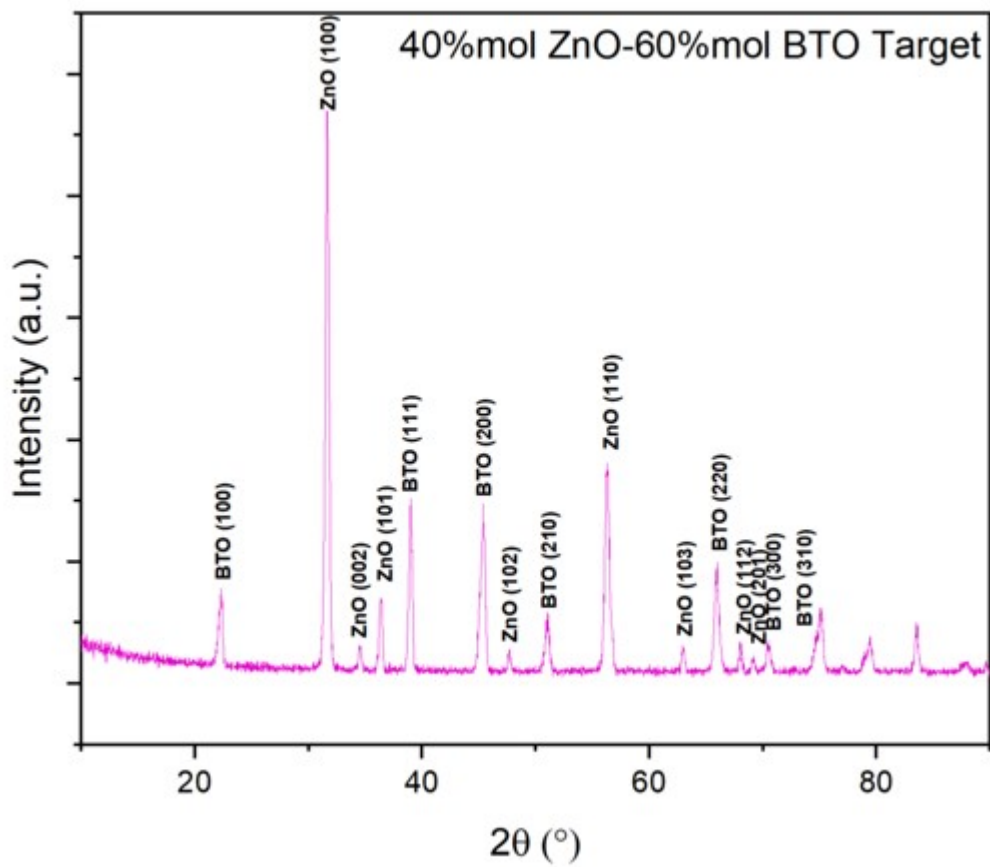

**Figure S8:** XRD  $\theta - 2\theta$  scan of the 40%mol ZnO - 60%mol BTO nanocomposite target.

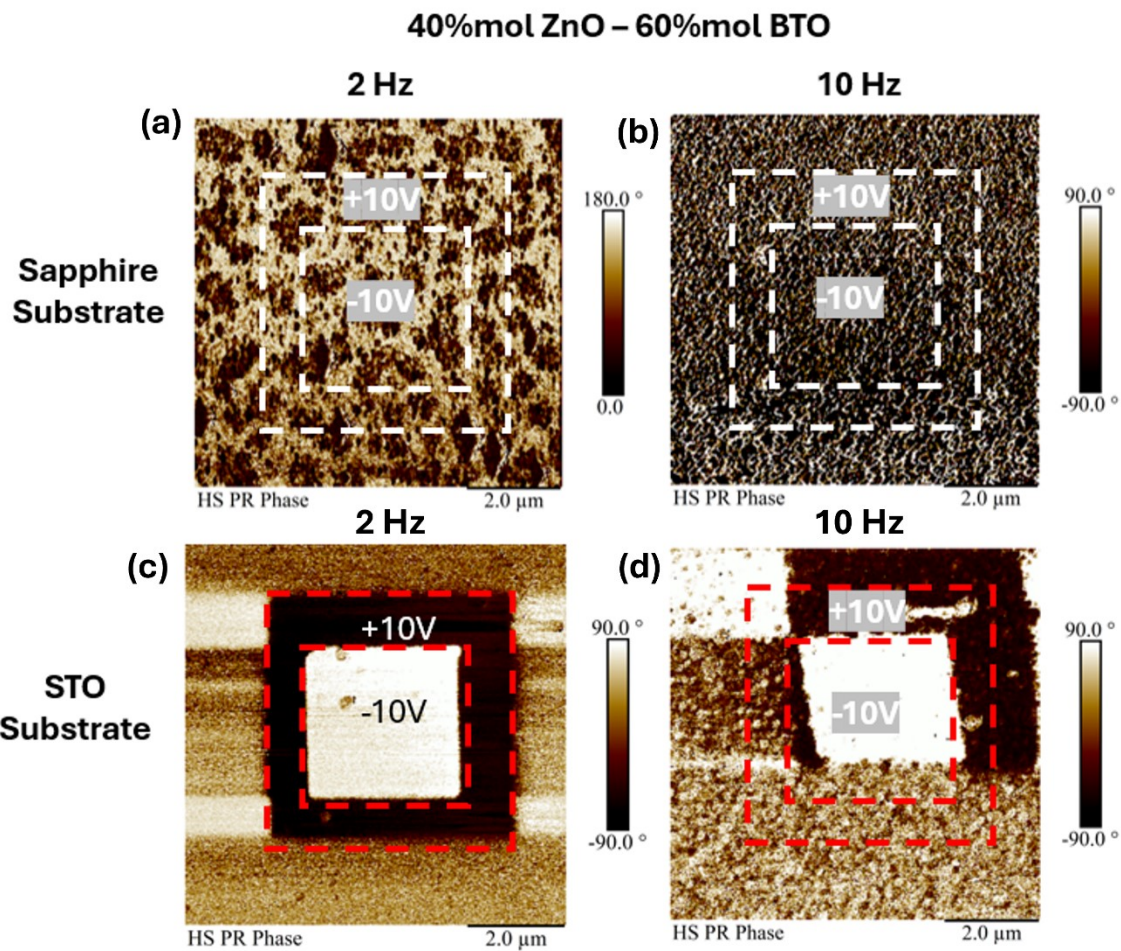

**Figure S9:** PFM phase maps of 40%mol ZnO – 60%mol BTO thin films. Phase map of (a) 2 Hz and (b) 10 Hz 40%mol ZnO – 60%mol BTO on Sapphire. Phase map of (c) 2 Hz and (d) 10 Hz 40%mol ZnO – 60%mol BTO on STO.

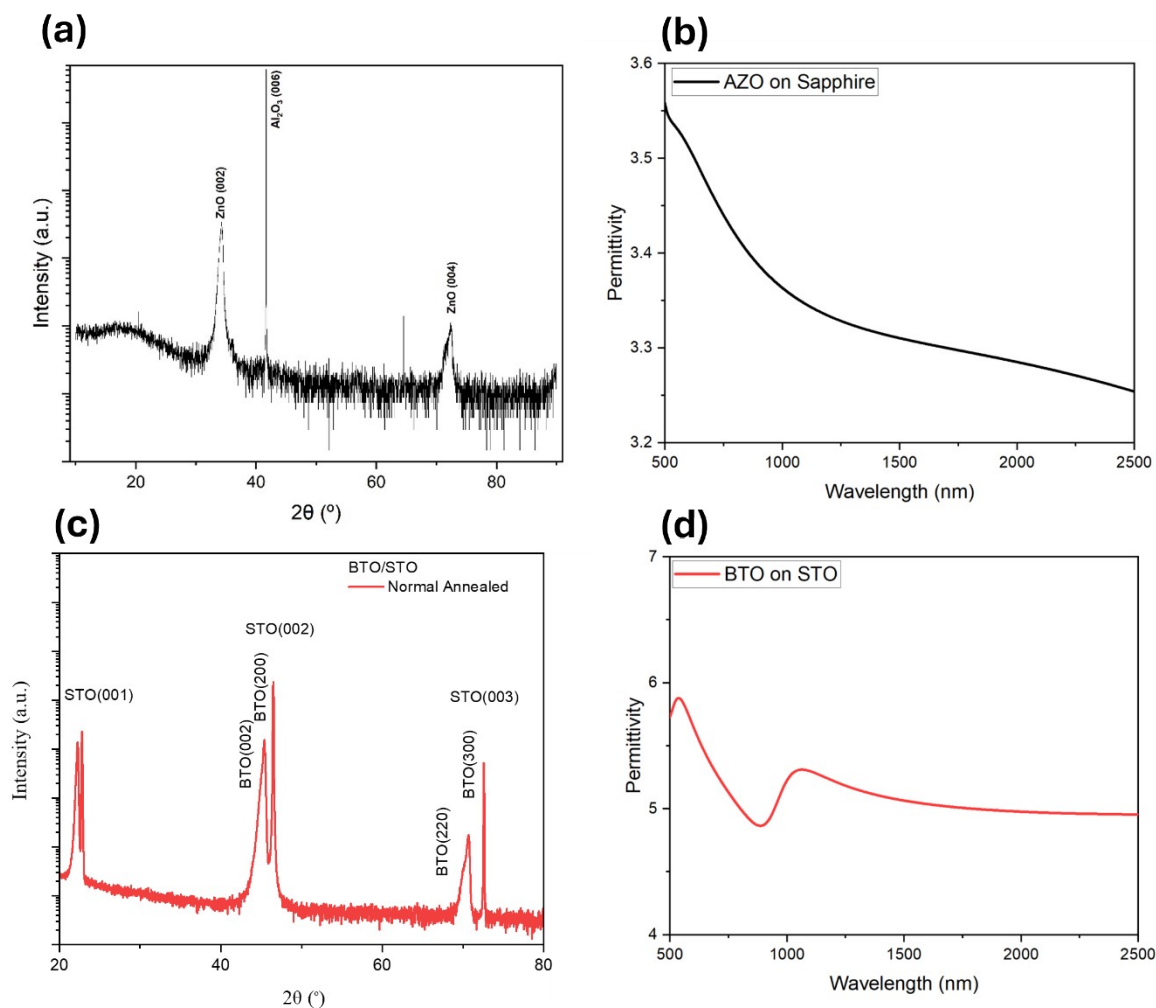

**Figure S10:** (a) XRD of Al-doped ZnO (AZO) on Sapphire, (b) permittivity data of AZO on Sapphire, (c) XRD of BTO on STO, and (d) permittivity data of BTO on STO.
